# Supplementary material for: A mixed-methods study of maternal health care utilisation in six referral hospitals in four sub-Saharan African countries before and during the COVID-19 pandemic
Source: PubMed Central journal article supplement — BMJ Glob Health. 2022 Feb 16;7(2):e008064. doi: 10.1136/bmjgh-2021-008064 (PMC8852239; doi:10.1136/bmjgh-2021-008064), 2022-02-16
Supplement: bmjgh-2021-008064supp001.pdf [file bmjgh-2021-008064supp001.pdf]

**Supplementary material 1 - Sources of routine data in each referral hospital and indicator definitions**

| Country                                 | GUINEA                                                       |                                                     | NIGERIA                                                        | TANZANIA                    | UGANDA                             |                                                  | Indicator definitions                                                                                                                                |
|-----------------------------------------|--------------------------------------------------------------|-----------------------------------------------------|----------------------------------------------------------------|-----------------------------|------------------------------------|--------------------------------------------------|------------------------------------------------------------------------------------------------------------------------------------------------------|
| Hospital name                           | Hôpital National Ignace Deen (Ignace Deen National Hospital) | Hôpital Regional de Mamou (Mamou Regional Hospital) | Lagos University Teaching Hospital                             | Muhimbili National Hospital | Kawempe National Referral Hospital | Mulago Specialised Women's and Neonatal Hospital |                                                                                                                                                      |
| Abbreviation                            | <b>HNID</b>                                                  | <b>HRM</b>                                          | <b>LUTH</b>                                                    | <b>MNH</b>                  | <b>KNRH</b>                        | <b>MSWNH</b>                                     |                                                                                                                                                      |
| <b>Indicator / Sources</b>              |                                                              |                                                     |                                                                |                             |                                    |                                                  |                                                                                                                                                      |
| Outpatient antenatal care consultations | Service not offered                                          | Consultation register                               | Medical records for antenatal clinic (sum of daily attendance) | Antenatal clinic MRF        | HMIS; Antenatal clinic register    | HMIS; Antenatal clinic register                  | Total number of antenatal care consultations conducted in the outpatient clinic per month.                                                           |
| Births                                  | SNIS report; Labour ward register                            | SNIS report; Labour ward register                   | Labour ward register; Labour ward theatre register             | Labour ward MRF             | HMIS; Maternity ward register      | Delivery book                                    | Total number of births per month (vaginal and abdominal); does not include births before arrival; births of multiple pregnancies are counted as one. |
| Outpatient postnatal care consultations | Service not offered                                          | Service not offered                                 | Medical records for postnatal clinic (sum of daily attendance) | Postnatal clinic MRF        | HMIS; Postnatal clinic register    | HMIS; Postnatal clinic register                  | Total number of postnatal care consultations conducted in the outpatient clinic per month.                                                           |
| <b>Number of sources</b>                | 2                                                            | 2                                                   | 4                                                              | 3                           | 4                                  | 4                                                |                                                                                                                                                      |

HMIS: Health Management Information System; MRF: Monthly report form; SNIS: Système National d'Information Sanitaire / National Health Information System
